# Supplementary material for: Interstitial N-doped SrSnO3 perovskite: structural design, modification and photocatalytic degradation of dyes
Source: Royal Society of Chemistry journal article supplement (doi:10.1039/c9nj02087j), 2019-01-01
Supplement: c9nj02087j1.pdf [file c9nj02087j1.pdf]

## Supporting Information

### Interstitial N-doped SrSnO<sub>3</sub> perovskite: Structural design, modification and photocatalytic degradation for dyes

Xinhua Zhang, Anjie Liu, Yali Cao\*, Jing Xie, Wei Jia, Diansheng Jia\*

*Key Laboratory of Energy Materials Chemistry, Ministry of Education, Key  
Laboratory of Advanced Functional Materials, Autonomous Region, Institute of  
Applied Chemistry, Xinjiang University, Urumqi, Xinjiang 830046, China.*

---

\*Corresponding author. Tel: +86-991-8583083. Fax: +86-991-8588883.

E-mail addresses: caoyali523@163.com; jdz@xju.edu.cn.

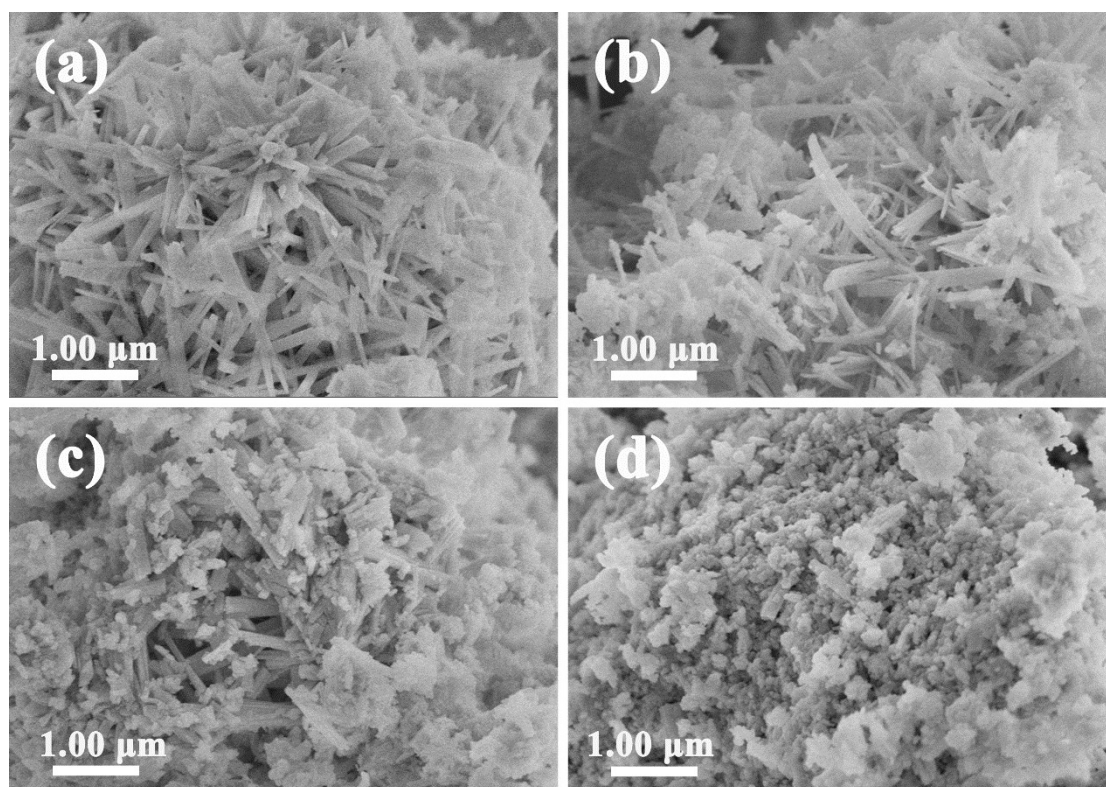

Fig. S1. SEM images of (a) SSOH-N<sub>0</sub>, (b) SSOH-N<sub>1</sub>, (c) SSOH-N<sub>2</sub> and (d) SSOH-N<sub>3</sub>.

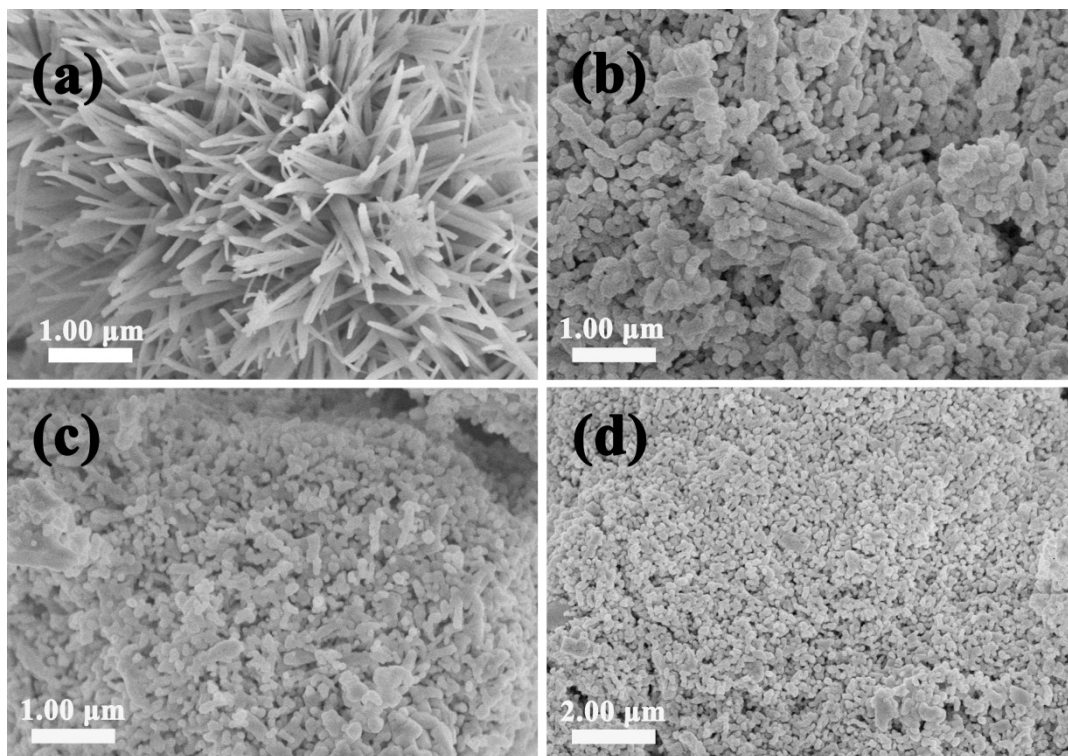

Fig. S2. SEM images of (a) SSO-700-N<sub>0</sub>, (b) SSO-700-N<sub>1</sub>, (c) SSO-700-N<sub>2</sub> and (d) SSO-700-N<sub>3</sub>.

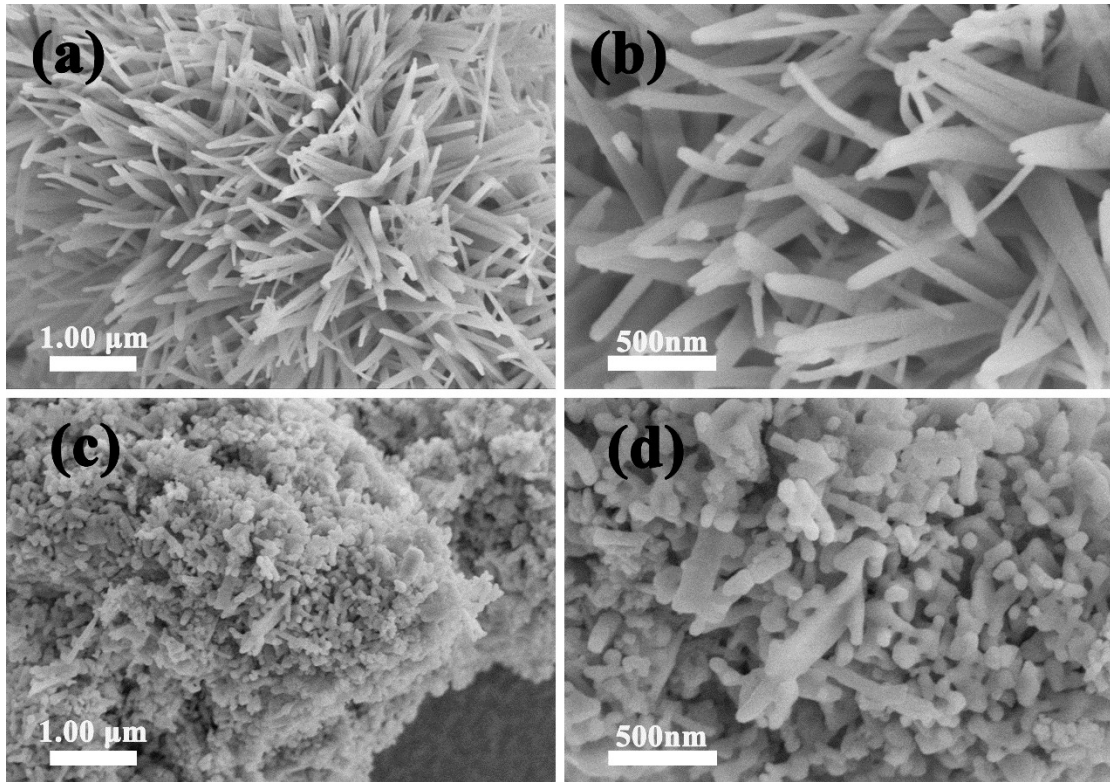

Fig. S3. SEM patterns of (a-b) SSO-700-N<sub>0</sub> and (c-d) SSO-700-N<sub>2</sub>-Air.

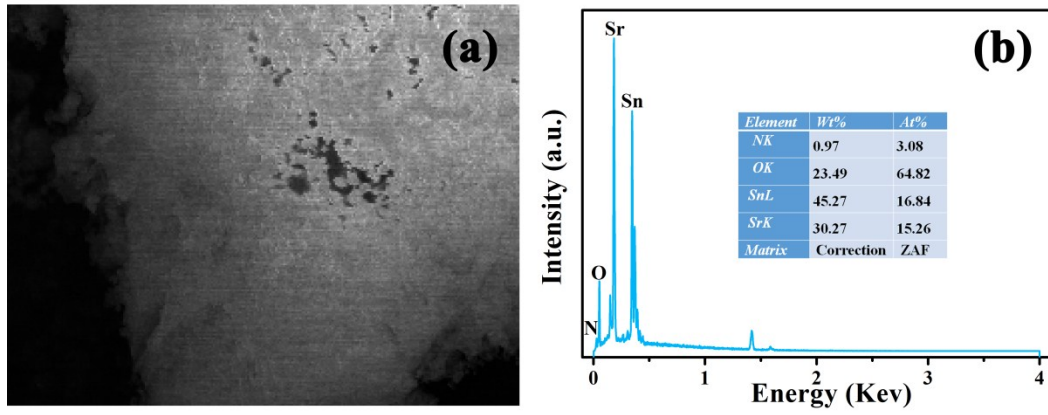

Fig. 4. (a) The FESEM image corresponds to elemental mapping and (b) EDS pattern of SSO-700-N<sub>1</sub>.

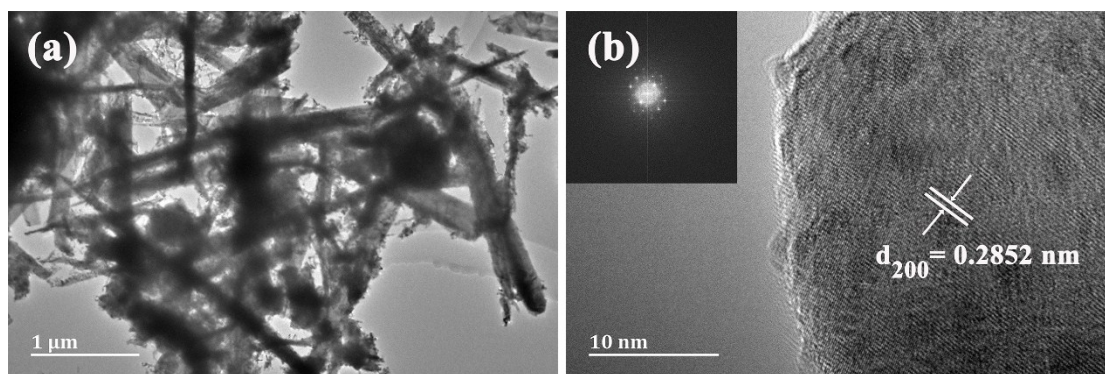

Fig. S5. (a) TEM and (b) HRTEM images of SSO-700-N<sub>0</sub>.

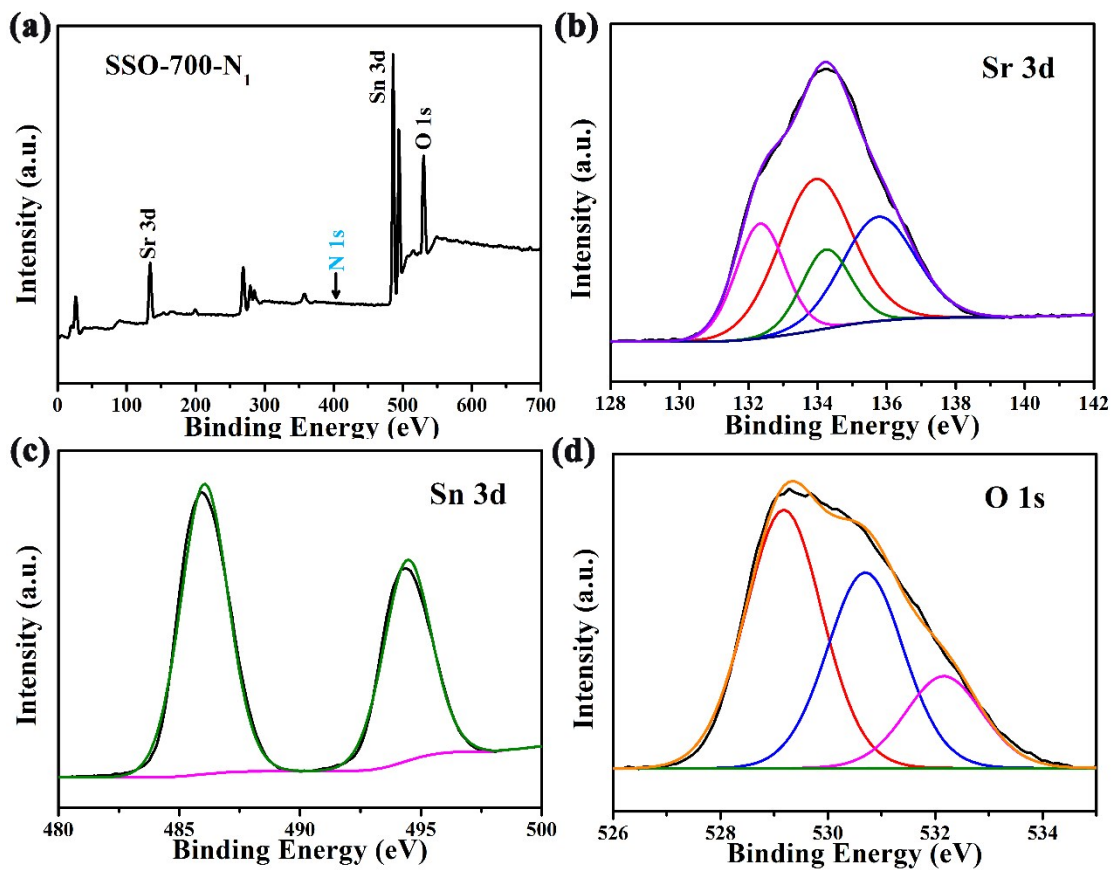

Fig. S6. XPS survey spectra of SSO-700-N<sub>1</sub>.

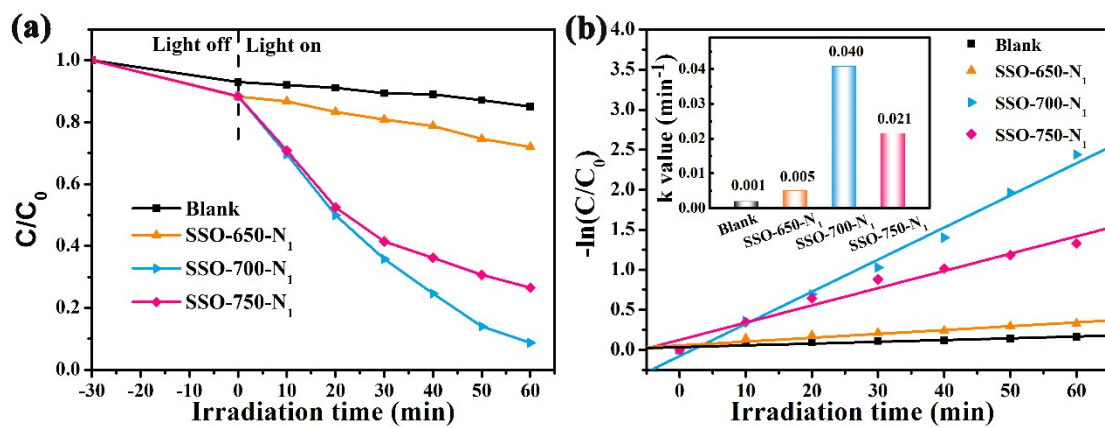

Fig. S7. (a) The photocatalytic degradation of SSO-N<sub>1</sub> products under different thermal treatment conditions on the MB aqueous solution and (b) the corresponding reaction kinetic curves.

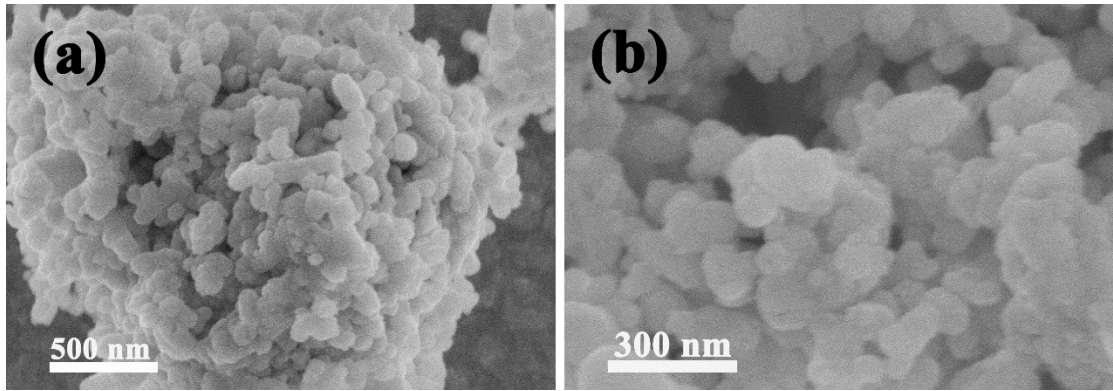

Fig. S8. SEM patterns of SSO-700-N<sub>1</sub> after 5 runs.



Table S1. EDS data of SSO-700-N<sub>0</sub>, SSO-700-N<sub>1</sub>, SSO-700-N<sub>2</sub> and SSO-700-N<sub>3</sub>.

| Sample | SSO-700-N <sub>0</sub> |       | SSO-700-N <sub>1</sub> |       | SSO-700-N <sub>2</sub> |       | SSO-700-N <sub>3</sub> |       |
|--------|------------------------|-------|------------------------|-------|------------------------|-------|------------------------|-------|
|        | Wt%                    | At%   | Wt%                    | At%   | Wt%                    | At%   | Wt%                    | At%   |
| NK     | 0.00                   | 0.00  | 0.97                   | 3.08  | 01.70                  | 05.83 | 2.90                   | 9.42  |
| OK     | 23.41                  | 66.45 | 23.49                  | 64.82 | 19.72                  | 59.20 | 19.96                  | 56.75 |
| SnL    | 45.30                  | 17.33 | 45.27                  | 16.84 | 46.04                  | 18.63 | 45.77                  | 17.54 |
| SrK    | 31.29                  | 16.22 | 30.27                  | 15.26 | 32.54                  | 17.84 | 31.37                  | 16.29 |

Table S2. Atomic concentrations of Sn, Sr, N, O, and N in SSO-700-N<sub>1</sub> as determined from the XPS spectra.

| Sample                 | Atomic % |       |       |      |
|------------------------|----------|-------|-------|------|
|                        | Sn 3d    | Sr 3d | O 1s  | N 1s |
| SSO-700-N <sub>1</sub> | 18.32    | 17.93 | 60.56 | 3.19 |
